# Supplementary material for: Safflower (Carthamus tinctorius L.) crop adaptation to residual moisture stress: conserved water use and canopy temperature modulation are better adaptive mechanisms
Source: PeerJ. 2023 Sep 11;11:e15928. doi: 10.7717/peerj.15928 (PMC10501382; doi:10.7717/peerj.15928)
Supplement: Supplemental Information 6 [file peerj-11-15928-s006.xlsx]

## Sheet: Sheet1
POT EXPERIMENTS DATA, POOLED (2020-21, 22)
	FTSW-NTR					TDM (WW)					TDM(WS)					TE(WS)					TE(WW)					SCMR					TRANSPIRATION RATE					STOMATAL CONDUCTANC					TEMP					ASSIMILATION RATE
Genotype	R1	R2	R3	MEAN		R1	R2	R3	MEAN		R1	R2	R3	MEAN		R1	R2	R3	MEAN		R1	R2	R3	MEAN		R1	R2	R3	MEAN		R1	R2	R3	MEAN		R1	R2	R3	MEAN		R1	R2	R3	MEAN		R1	R2	R3	MEAN
EC-523368-2	0.77	0.665	0.735	0.723333		15.514	14.7383	16.2897	15.514		10.4382	9.91629	10.9601	10.4382		2.64	2.508	2.772	2.64		4.31	4.0945	4.5255	4.31		66.467	63.1437	69.7904	66.467		2.63	2.4985	2.7615	2.63		79.33	75.3635	83.2965	79.33		31	29.45	32.55	31		16.23	15.4185	17.0415	16.23
A1	0.7584	0.8216	0.79	0.79		15.1814	16.4466	15.814	15.814		10.436	11.3056	10.8708	10.8708		2.8416	3.0784	2.96	2.96		4.6272	5.0128	4.82	4.82		50.0803	54.2537	52.167	52.167		1.2288	1.3312	1.28	1.28		31.0368	33.6232	32.33	32.33		29.4432	31.8968	30.67	30.67		12.672	13.728	13.2	13.2
BHIMA	0.7844	0.6956	0.74	0.74		17.0872	15.1528	16.12	16.12		11.3742	10.0866	10.7304	10.7304		2.6076	2.3124	2.46	2.46		4.717	4.183	4.45	4.45		52.399	46.467	49.433	49.433		1.537	1.363	1.45	1.45		49.1098	43.5502	46.33	46.33		33.5702	29.7698	31.67	31.67		13.1758	11.6842	12.43	12.43
CO-1	0.6532	0.71	0.7668	0.71		16.2012	17.61	19.0188	17.61		9.22116	10.023	10.8248	10.023		2.29632	2.496	2.69568	2.496		4.4896	4.88	5.2704	4.88		59.7384	64.933	70.1276	64.933		1.3432	1.46	1.5768	1.46		41.0964	44.67	48.2436	44.67		27.9036	30.33	32.7564	30.33		13.616	14.8	15.984	14.8
GMU 2347	0.7313	0.71	0.6887	0.71		20.427	19.832	19.237	19.832		14.7372	14.308	13.8788	14.308		3.1621	3.07	2.9779	3.07		4.429	4.3	4.171	4.3		46.556	45.2	43.844	45.2		1.7716	1.72	1.6684	1.72		53.56	52	50.44	52		31.2399	30.33	29.4201	30.33		10.9901	10.67	10.3499	10.67
GMU 2644	0.3952	0.38	0.3648	0.38		18.9862	18.256	17.5258	18.256		8.8296	8.49	8.1504	8.49		1.3416	1.29	1.2384	1.29		2.6624	2.56	2.4576	2.56		37.752	36.3	34.848	36.3		1.5808	1.52	1.4592	1.52		49.2232	47.33	45.4368	47.33		32.24	31	29.76	31		8.7672	8.43	8.0928	8.43
GMU 2648	0.46	0.483	0.437	0.46		22.0414	23.1435	20.9393	22.0414		8.56	8.988	8.132	8.56		1.65	1.7325	1.5675	1.65		2.9	3.045	2.755	2.9		51.933	54.5297	49.3363	51.933		1.67	1.7535	1.5865	1.67		50	52.5	47.5	50		30.67	32.2035	29.1365	30.67		13.87	14.5635	13.1765	13.87
GMU 3266	0.5936	0.56	0.5264	0.56		19.7771	18.6576	17.5381	18.6576		9.54	9	8.46	9		2.0246	1.91	1.7954	1.91		3.4238	3.23	3.0362	3.23		38.4356	36.26	34.0844	36.26		3.5934	3.39	3.1866	3.39		50.88	48	45.12	48		32.5102	30.67	28.8298	30.67		12.084	11.4	10.716	11.4
GMU 3438	0.48	0.4464	0.5136	0.48		17.346	16.1318	18.5602	17.346		8.9	8.277	9.523	8.9		1.71	1.5903	1.8297	1.71		2.81	2.6133	3.0067	2.81		44.333	41.2297	47.4363	44.333		2.03	1.8879	2.1721	2.03		64.33	59.8269	68.8331	64.33		30.33	28.2069	32.4531	30.33		19.63	18.2559	21.0041	19.63
ISF 764	0.6256	0.7344	0.68	0.68		15.4652	18.1548	16.81	16.81		9.568	11.232	10.4	10.4		2.116	2.484	2.3	2.3		3.634	4.266	3.95	3.95		56.212	65.988	61.1	61.1		1.2512	1.4688	1.36	1.36		42.32	49.68	46	46		27.9036	32.7564	30.33	30.33		12.2084	14.3316	13.27	13.27
NARI 6	0.6912	0.72	0.7488	0.72		17.2032	17.92	18.6368	17.92		10.3488	10.78	11.2112	10.78		2.2752	2.37	2.4648	2.37		3.7344	3.89	4.0456	3.89		50.016	52.1	54.184	52.1		1.1328	1.18	1.2272	1.18		38.7168	40.33	41.9432	40.33		29.76	31	32.24	31		9.9552	10.37	10.7848	10.37
PBNS 12	0.702	0.598	0.65	0.65		17.2584	14.7016	15.98	15.98		11.6532	9.9268	10.79	10.79		2.2896	1.9504	2.12	2.12		4.1148	3.5052	3.81	3.81		48.7804	41.5536	45.167	45.167		1.8144	1.5456	1.68	1.68		56.16	47.84	52	52		32.7564	27.9036	30.33	30.33		10.2924	8.7676	9.53	9.53
FIELD EXPERIMENT DATA, 2020-21,22
	CTD(V)					CTD(F)					DAYS TO MATURITY					SCMR@60 DAS					LAI					TRANSPIRATION RATE					STOMATAL CONDUCTANCE					LEAF TEMP					ASSIMILATION RATE
Genotype	R1	R2	R3	MEAN		R1	R2	R3	MEAN		R1	R2	R3	MEAN		R1	R2	R3	MEAN		R1	R2	R3	MEAN		R1	R2	R3	MEAN		R1	R2	R3	MEAN		R1	R2	R3	MEAN		R1	R2	R3	MEAN
EC-523368-2	2.05	1.9475	2.1525	2.05		-11.31	-10.7445	-11.8755	-11.31		121.5	115.425	127.575	121.5		44.475	42.2512	46.6988	44.475		1.01667	0.965833	1.0675	1.01667		3.44	3.268	3.612	3.44		109	103.55	114.45	109		31	29.45	32.55	31		26.5	25.175	27.825	26.5
A1	-8.9664	-9.7136	-9.34	-9.34		-14.4288	-15.6312	-15.03	-15.03		115.68	125.32	120.5	120.5		44.664	48.386	46.525	46.525		0.9792	1.0608	1.02	1.02		1.8432	1.9968	1.92	1.92		51.84	56.16	54	54		29.76	32.24	31	31		28.32	30.68	29.5	29.5
BHIMA	-9.0418	-8.0182	-8.53	-8.53		-13.0804	-11.5996	-12.34	-12.34		127.73	113.27	120.5	120.5		49.8465	44.2035	47.025	47.025		1.166	1.034	1.1	1.1		1.2508	1.1092	1.18	1.18		34.98	31.02	33	33		34.98	31.02	33	33		20.882	18.518	19.7	19.7
CO-1	-6.6424	-7.22	-7.7976	-7.22		-10.9572	-11.91	-12.8628	-11.91		114.54	124.5	134.46	124.5		49.887	54.225	58.563	54.225		0.732933	0.796667	0.8604	0.796667		1.0304	1.12	1.2096	1.12		47.84	52	56.16	52		30.36	33	35.64	33		19.964	21.7	23.436	21.7
GMU 2347	-0.6798	-0.66	-0.6402	-0.66		-13.5033	-13.11	-12.7167	-13.11		117.42	114	110.58	114		54.4098	52.825	51.2403	52.825		1.133	1.1	1.067	1.1		1.751	1.7	1.649	1.7		33.99	33	32.01	33		31.93	31	30.07	31		19.673	19.1	18.527	19.1
GMU 2644	-10.7016	-10.29	-9.8784	-10.29		-7.2904	-7.01	-6.7296	-7.01		125.32	120.5	115.68	120.5		48.568	46.7	44.832	46.7		0.979333	0.941667	0.904	0.941667		2.2464	2.16	2.0736	2.16		67.6	65	62.4	65		33.28	32	30.72	32		24.024	23.1	22.176	23.1
GMU 2648	-10.15	-10.6575	-9.6425	-10.15		-3.61	-3.7905	-3.4295	-3.61		119	124.95	113.05	119		43.45	45.6225	41.2775	43.45		0.7375	0.774375	0.700625	0.7375		1.17	1.2285	1.1115	1.17		61	64.05	57.95	61		33	34.65	31.35	33		18.23	19.1415	17.3185	18.23
GMU 3266	-11.5964	-10.94	-10.2836	-10.94		-6.4872	-6.12	-5.7528	-6.12		128.79	121.5	114.21	121.5		47.4615	44.775	42.0885	44.775		0.8798	0.83	0.7802	0.83		1.8656	1.76	1.6544	1.76		69.96	66	62.04	66		37.1	35	32.9	35		17.914	16.9	15.886	16.9
GMU 3438	-9.9	-9.207	-10.593	-9.9		-7.966	-7.40838	-8.52362	-7.966		116	107.88	124.12	116		48.95	45.5235	52.3765	48.95		0.69	0.6417	0.7383	0.69		1.95	1.8135	2.0865	1.95		58	53.94	62.06	58		33	30.69	35.31	33		19.5	18.135	20.865	19.5
ISF 764	-0.5888	-0.6912	-0.64	-0.64		-11.8781	-13.9439	-12.911	-12.911		106.72	125.28	116	116		41.538	48.762	45.15	45.15		1.0396	1.2204	1.13	1.13		1.702	1.998	1.85	1.85		99.36	116.64	108	108		32.2	37.8	35	35		17.756	20.844	19.3	19.3
NARI 6	-8.352	-8.7	-9.048	-8.7		-14.2176	-14.81	-15.4024	-14.81		115.68	120.5	125.32	120.5		49.608	51.675	53.742	51.675		0.9272	0.965833	1.00447	0.965833		1.872	1.95	2.028	1.95		60.48	63	65.52	63		29.76	31	32.24	31		26.784	27.9	29.016	27.9
PBNS 12	-5.292	-4.508	-4.9	-4.9		-11.0052	-9.3748	-10.19	-10.19		128.52	109.48	119	119		50.949	43.401	47.175	47.175		0.9657	0.822633	0.894167	0.894167		1.1556	0.9844	1.07	1.07		33.48	28.52	31	31		35.64	30.36	33	33		26.892	22.908	24.9	24.9
	BIOMASS					NPC					NSC					WMC					WPC					WSC					SEED YIELD					PLANT HEIGHT					RWC
Genotype	R1	R2	R3	MEAN		R1	R2	R3	MEAN		R1	R2	R3	MEAN		R1	R2	R3	MEAN		R1	R2	R3	MEAN		R1	R2	R3	MEAN		R1	R2	R3	MEAN		R1	R2	R3	MEAN		R1	R2	R3	MEAN
EC-523368-2	32.6	30.97	34.23	32.6		7	6.65	7.35	7		7.6	7.22	7.98	7.6		1.51	1.4345	1.5855	1.51		10.36	9.842	10.878	10.36		5.89	5.5955	6.1845	5.89		8.82	8.379	9.261	8.82		56.4	53.58	59.22	56.4		87.3	82.935	91.665	87.3
A1	48.864	52.936	50.9	50.9		5.856	6.344	6.1	6.1		7.968	8.632	8.3	8.3		2.1696	2.3504	2.26	2.26		9.9168	10.7432	10.33	10.33		6.7584	7.3216	7.04	7.04		17.8944	19.3856	18.64	18.64		73.44	79.56	76.5	76.5		88.608	95.992	92.3	92.3
BHIMA	98.792	87.608	93.2	93.2		15.158	13.442	14.3	14.3		35.086	31.114	33.1	33.1		3.4238	3.0362	3.23	3.23		25.2492	22.3908	23.82	23.82		31.7576	28.1624	29.96	29.96		13.5044	11.9756	12.74	12.74		84.8	75.2	80	80		91.69	81.31	86.5	86.5
CO-1	42.32	46	49.68	46		6.9	7.5	8.1	7.5		6.9	7.5	8.1	7.5		2.1896	2.38	2.5704	2.38		10.6076	11.53	12.4524	11.53		6.256	6.8	7.344	6.8		11.2332	12.21	13.1868	12.21		80.408	87.4	94.392	87.4		74.98	81.5	88.02	81.5
GMU 2347	35.226	34.2	33.174	34.2		7.416	7.2	6.984	7.2		11.021	10.7	10.379	10.7		1.6068	1.56	1.5132	1.56		9.27	9	8.73	9		5.6959	5.53	5.3641	5.53		12.2982	11.94	11.5818	11.94		70.246	68.2	66.154	68.2		87.241	84.7	82.159	84.7
GMU 2644	43.264	41.6	39.936	41.6		8.216	7.9	7.584	7.9		12.064	11.6	11.136	11.6		2.6832	2.58	2.4768	2.58		13.676	13.15	12.624	13.15		10.9928	10.57	10.1472	10.57		9.4016	9.04	8.6784	9.04		75.4	72.5	69.6	72.5		77.584	74.6	71.616	74.6
GMU 2648	34.8	36.54	33.06	34.8		6.6	6.93	6.27	6.6		9.9	10.395	9.405	9.9		2.38	2.499	2.261	2.38		10.72	11.256	10.184	10.72		9.06	9.513	8.607	9.06		11.1	11.655	10.545	11.1		70	73.5	66.5	70		71.3	74.865	67.735	71.3
GMU 3266	46.64	44	41.36	44		7.42	7	6.58	7		9.54	9	8.46	9		2.0564	1.94	1.8236	1.94		11.4162	10.77	10.1238	10.77		8.6072	8.12	7.6328	8.12		13.9496	13.16	12.3704	13.16		73.67	69.5	65.33	69.5		78.122	73.7	69.278	73.7
GMU 3438	50.9	47.337	54.463	50.9		9.1	8.463	9.737	9.1		13.4	12.462	14.338	13.4		2.03	1.8879	2.1721	2.03		15.32	14.2476	16.3924	15.32		13.07	12.1551	13.9849	13.07		15.84	14.7312	16.9488	15.84		70.5	65.565	75.435	70.5		72.4	67.332	77.468	72.4
ISF 764	54.096	63.504	58.8	58.8		11.132	13.068	12.1	12.1		14.72	17.28	16	16		2.0608	2.4192	2.24	2.24		16.376	19.224	17.8	17.8		14.2876	16.7724	15.53	15.53		19.9548	23.4252	21.69	21.69		68.54	80.46	74.5	74.5		70.012	82.188	76.1	76.1
NARI 6	35.616	37.1	38.584	37.1		7.008	7.3	7.592	7.3		12.288	12.8	13.312	12.8		1.5744	1.64	1.7056	1.64		7.6224	7.94	8.2576	7.94		8.0064	8.34	8.6736	8.34		8.1696	8.51	8.8504	8.51		87.456	91.1	94.744	91.1		80.256	83.6	86.944	83.6
PBNS 12	60.48	51.52	56	56		12.744	10.856	11.8	11.8		19.764	16.836	18.3	18.3		3.0348	2.5852	2.81	2.81		18.8136	16.0264	17.42	17.42		21.2004	18.0596	19.63	19.63		19.3968	16.5232	17.96	17.96		80.784	68.816	74.8	74.8		87.264	74.336	80.8	80.8
