# Supplementary material for: Safflower (Carthamus tinctorius L.) crop adaptation to residual moisture stress: conserved water use and canopy temperature modulation are better adaptive mechanisms
Source: PeerJ. 2023 Sep 11;11:e15928. doi: 10.7717/peerj.15928 (PMC10501382; doi:10.7717/peerj.15928)
Supplement: Supplemental Information 7 — Each data point represents data generated by pooling two seasons data, at five replications for each genotype. [file peerj-11-15928-s007.xlsx]

## Sheet: Sheet1
GMU 3438		68-2		GMU 2347		A1		BHIMA		C0-1		GMU 2644		GMU 2648		GMU 3266		ISF 764		NARI 6		PBNS12
FTSW	NTR	FTSW	NTR	FTSW	NTR	FTSW	NTR	FTSW	NTR	FTSW	NTR	FTSW	NTR	FTSW	NTR	FTSW	NTR	FTSW	NTR	FTSW	NTR	FTSW	NTR
1	0.994027	1	0.994893	1	1	1	1.00336	1	1.00893	1	0.91	1	0.986191	1	1.01349	1	1.00009	1	1.00071	1	1.06186	1	1.01852
0.886067	1.00597	0.849365	1.00511	0.877272	0.978673	0.857882	0.9	0.868845	0.991074	0.842599	0.88	0.867169	1.01381	0.858829	0.986507	0.882624	0.999913	0.837829	0.999295	0.870019	0.973006	0.854005	0.981478
0.77283	0.993654	0.704096	0.935606	0.756998	0.961599	0.719626	0.92	0.742919	0.9801	0.718682	0.860613	0.732477	0.989353	0.725552	0.93663	0.768433	0.938402	0.677269	0.67809	0.752803	1.00087	0.724798	0.953499
0.660289	0.937871	0.569699	0.751186	0.652972	0.747336	0.584846	0.736214	0.637734	0.566141	0.603018	0.85	0.603013	0.832801	0.602238	0.92028	0.665289	0.95091	0.521298	0.393164	0.640489	0.9438	0.608387	0.855574
0.554531	0.659456	0.462456	0.61772	0.575478	0.658825	0.487294	0.715221	0.55085	0.557957	0.509757	0.76	0.497297	0.599305	0.485898	0.70073	0.564719	0.769709	0.417022	0.371644	0.537786	0.69918	0.50625	0.85047
0.480605	0.568693	0.377597	0.514313	0.510198	0.560958	0.395149	0.709843	0.468148	0.540104	0.427578	0.61	0.424369	0.54414	0.401824	0.609044	0.484888	0.644046	0.357436	0.299879	0.463331	0.644046	0.405813	0.721654
0.415724	0.500261	0.308426	0.453737	0.457133	0.534715	0.305399	0.670444	0.38963	0.411703	0.353652	0.46722	0.36101	0.541478	0.329936	0.437318	0.41949	0.608361	0.301554	0.238225	0.402563	0.608361	0.310554	0.41748
0.354149	0.661855	0.248245	0.385072	0.408042	0.522891	0.222136	0.362841	0.331242	0.385685	0.29641	0.436603	0.300399	0.521754	0.27943	0.411218	0.35904	0.545977	0.24994	0.223115	0.346454	0.545977	0.256786	0.287824
0.298226	0.573283	0.19889	0.348096	0.360353	0.502287	0.178651	0.303854	0.277298	0.361056	0.244414	0.0107176	0.243952	0.323682	0.233292	0.378106	0.305977	0.510027	0.20992	0.211326	0.295006	0.510027	0.22025	0.240324
0.247956	0.299274	0.155956	0.321919	0.315762	0.607209	0.14235	0.296476	0.227538	0.300829	0.206508	0.351199	0.210013	0.309364	0.192597	0.342293	0.256912	0.453527	0.176584	0.199971	0.245401	0.453527	0.190001	0.188096
0.209167	0.437569	0.117059	0.26996	0.262813	0.584609	0.107129	0.289368	0.186667	0.272395	0.166834	0.283874	0.178556	0.277893	0.156806	0.311371	0.21415	0.403003	0.145261	0.18644	0.20065	0.403003	0.160195	0.174259
0.176639	0.338209	0.085042	0.152963	0.212261	0.560832	0.073685	0.20937	0.15024	0.250723	0.13553	0.258063	0.151086	0.254868	0.12546	0.278255	0.176471	0.363673	0.116193	0.15901	0.160559	0.363673	0.132756	0.155709
0.152809	0.224358	0.0676116	0.135152	0.164105	0.442472	0.049973	0.114343	0.117647	0.215178	0.107882	0.237833	0.126274	0.239889	0.0984059	0.250514	0.143332	0.315607	0.0892987	0.119663	0.13134	0.315607	0.108794	0.140015
0.126413	0.216005	0.0524747	0.115972	0.126702	0.368083	0.0372287	0.0937423	0.0906318	0.207943	0.0825915	0.198715	0.1035	0.217422	0.0747241	0.224484	0.115072	0.279252	0.0667526	0.0957065	0.103577	0.279252	0.0877154	0.129325
0.0974517	0.0927008	0.0397229	0.11177	0.0960785	0.307038	0.0268788	0.0671884	0.065098	0.179269	0.0616636	0.173447	0.083385	0.207904	0.0541079	0.184379	0.090675	0.00854701	0.050004	0.0801358	0.0793088	0.00854701	0.06856	0.120734
0.0788398	0.115198	0.0277969	0.0973618	0.0708316	0.28797	0.0195412	0.0526399	0.0438344	0.129839	0.0436244	0.136821	0.0646876	0.192275	0.0376303	0.143868	0.0703443	0.226267	0.0367985	0.0686293	0.062321	0.226267	0.0508838	0.118589
0.0583145	0.102779	0.0177973	0.0762822	0.0475717	0.267385	0.0139028	0.0500852	0.0285839	0.112533	0.0295938	0.114887	0.048117	0.176309	0.0252146	0.132391	0.0519789	0.205389	0.0260085	0.0508967	0.0469834	0.205389	0.0352045	0.0943329
0.0391807	0.0930228	0.0102748	0.0597895	0.0262989	0.224478	0.00865065	0.0458797	0.0156863	0.0768103	0.0179214	0.0972264	0.0334072	0.158367	0.0142551	0.0979263	0.0357821	0.184017	0.0169096	0.0441792	0.033102	0.184017	0.0228533	0.0760538
0.0240911	0.0898961	0.00467868	0.0514176	0.00876629	0.121278	0.00393914	0.0397201	0.00697168	0.0618848	0.00813535	0.0814758	0.0207355	0.150242	0.00636113	0.0814838	0.0218894	0.166262	0.0102263	0.03	0.0207737	0.166262	0.0130907	0.0584609
0.0130457	0.075705	0.003	0.0421538	0.0349563	0.0984864	0.0412024	0.0289563	0.0107068	0.0534457	0.0967395	0.070543	0.00912716	0.120072	0.0969061	0.0709667	0.00996205	0.1416	0.00450922	0.01	0.0100956	0.1416	0.00569485	0.0465364
